# Supplementary material for: Targeting complement C5a to improve radiotherapy sensitivity in non-small cell lung cancer
Source: PubMed Central journal article supplement — Transl Lung Cancer Res. 2023 May 29;12(5):1093–107. doi: 10.21037/tlcr-23-258 (PMC10261863; doi:10.21037/tlcr-23-258), 2023-05-29
Supplement: tlcr-12-05-1093-dss.pdf [file tlcr-12-05-1093-dss.pdf]

## Data Sharing Statement

|                     |                                                                                                                                                    |                                                                                                                         |
|---------------------|----------------------------------------------------------------------------------------------------------------------------------------------------|-------------------------------------------------------------------------------------------------------------------------|
| <b>Article Info</b> | <a href="https://dx.doi.org/10.21037/tlcr-23-258">https://dx.doi.org/10.21037/tlcr-23-258</a>                                                      |                                                                                                                         |
| <b>Item</b>         | <b>Question</b>                                                                                                                                    | <b>Authors' Response<br/>(place "-" if not applicable)</b>                                                              |
| 1                   | Would you like to share data collected for your study to others?                                                                                   | Yes.                                                                                                                    |
| 2                   | If not, would you like to share the reason for your decision?                                                                                      | -                                                                                                                       |
| 3                   | What data in particular will be shared?                                                                                                            | All data are available for all researchers in the world.                                                                |
| 4                   | Any other documents will be share? Such as study protocol, statistical analysis plan, informed consent form, clinical study report, analytic code. | Study protocol will also be shared if requested.                                                                        |
| 5                   | When will data availability begin?                                                                                                                 | From the publication date.                                                                                              |
| 6                   | When will data availability end?                                                                                                                   | Permanent validity.                                                                                                     |
| 7                   | To whom will you share the data?                                                                                                                   | All researchers in the world.                                                                                           |
| 8                   | For what type of analysis or purpose?                                                                                                              | Push forward the development of science.                                                                                |
| 9                   | How or where can the data/documents be obtained?                                                                                                   | The original data were available through contacting the corresponding author on reasonable request: zhangjd2233@126.com |
| 10                  | Any other restrictions?                                                                                                                            | No                                                                                                                      |
